# Supplementary material for: Efficiently targeting neuroblastoma with the combination of anti-ROR1 CAR NK cells and N-803 in vitro and in vivo in NB xenografts
Source: PubMed Central journal article supplement — Mol Ther Oncol. 2024 May 24;32(2):200820. doi: 10.1016/j.omton.2024.200820 (PMC11201149; doi:10.1016/j.omton.2024.200820), 2024-05-24
Supplement: mmc1.pdf [file mmc1.pdf]

**Supplemental information**

**Efficiently targeting neuroblastoma  
with the combination of anti-ROR1 CAR NK cells  
and N-803 *in vitro* and *in vivo* in NB xenografts**

**Yaya Chu, Gaurav Nayyar, Meijuan Tian, Dean A. Lee, Mehmet F. Ozkaynak, Jessica Ayala-Cuesta, Kayleigh Klose, Keira Foley, Alyssa S. Mendelowitz, Wen Luo, Yanling Liao, Janet Ayello, Gregory K. Behbehani, Stanley Riddell, Tim Cripe, and Mitchell S. Cairo**

## Supplemental Information

**Table S1. Summary of current clinical trials utilizing anti-ROR1 targeted immunotherapies.**

| Anti-ROR1 Agent                          | Patient Population                     | Phase                                                                                                                               | NCT Number                                                                                                              | Status      | Sponsor               | Country                                                                              |                                                     |     |
|------------------------------------------|----------------------------------------|-------------------------------------------------------------------------------------------------------------------------------------|-------------------------------------------------------------------------------------------------------------------------|-------------|-----------------------|--------------------------------------------------------------------------------------|-----------------------------------------------------|-----|
| <b>Anti-ROR1 Monoclonal Antibody</b>     | Cimtuzumab                             | CLL                                                                                                                                 | I/II                                                                                                                    | NCT02222688 | Completed             | Thomas Kipps                                                                         | USA                                                 |     |
|                                          | Cimtuzumab                             | Metastatic Castration-resistant Prostate Cancer                                                                                     | I                                                                                                                       | NCT05156905 | Recruiting            | UCSD                                                                                 | USA                                                 |     |
|                                          | Cimtuzumab                             | CLL                                                                                                                                 | I                                                                                                                       | NCT02860676 | Completed             | UCSD                                                                                 | USA                                                 |     |
|                                          | Cimtuzumab + Paclitaxel                | Breast Neoplasms                                                                                                                    | I                                                                                                                       | NCT02776917 | Active not recruiting | Barbara Parker, MD                                                                   | USA                                                 |     |
|                                          | Cimtuzumab + Ibrutinib                 | CLL, SLL, MCL, MZL                                                                                                                  | I                                                                                                                       | NCT03088878 | Active not recruiting | Oncternal Therapeutics, Inc                                                          | USA                                                 |     |
|                                          | Cimtuzumab + Venetoclax                | CLL                                                                                                                                 | I/II                                                                                                                    | NCT04501939 | Active not recruiting | UCSD                                                                                 | USA                                                 |     |
| <b>Anti-ROR1 Antibody Drug Conjugate</b> | CS5001                                 | Advanced Solid Tumor, Advanced Lymphoma                                                                                             | I                                                                                                                       | NCT05279300 | Recruiting            | CStone Pharmaceuticals                                                               | USA, Australia, China                               |     |
|                                          | EMB07                                  | Advanced Metastatic Solid Tumors, R/R Lymphoma                                                                                      | I                                                                                                                       | NCT05607498 | Recruiting            | EpimAb Biotherapeutics (Suzhou)Co., Ltd.                                             | Australia,China                                     |     |
|                                          | NVG-111                                | CLL, SLL, MCL, FL, DLBCL, NSCLC, Malignant Melanoma                                                                                 | I                                                                                                                       | NCT04763083 | Recruiting            | NovalGen Ltd.                                                                        | UK                                                  |     |
|                                          | Zilvertamab vedotin                    | Triple-negative Breast Cancer, NS-NSCLC, NSCLC, Breast Cancer, Platinum-resistant Ovarian Cancer, Gastric Cancer, Pancreatic Cancer | II                                                                                                                      | NCT04504916 | Completed             | VelosBio Inc., a subsidiary of Merck & Co., Inc. (Rahway, New Jersey USA)            | USA, Canada                                         |     |
|                                          | Zilvertamab vedotin                    | Urothelial Carcinoma                                                                                                                | I/II                                                                                                                    | NCT05562830 | Active not recruiting | Merck Sharp & Dohme LLC                                                              | USA, Australia, Chile, et al                        |     |
|                                          | Zilvertamab vedotin                    | CLL, MCL, FL, MZL, DLBCL, RTL, BL, Lymphoplasmacytoid Lymphoma, T-cell NHL, ALL, AML, WM                                            | I                                                                                                                       | NCT03833180 | Active not recruiting | VelosBio Inc., a subsidiary of Merck & Co., Inc. (Rahway, New Jersey USA)            | USA                                                 |     |
|                                          | Zilvertamab vedotin                    | R/R DLBCL                                                                                                                           | II                                                                                                                      | NCT05144841 | Recruiting            | Merck Sharp & Dohme LLC                                                              | USA, Canada, China, et al                           |     |
|                                          | Zilvertamab Vedotin+ R-CHOP            | DLBCL                                                                                                                               | II                                                                                                                      | NCT05406401 | Recruiting            | Merck Sharp & Dohme LLC                                                              | Canada                                              |     |
|                                          | Zilvertamab vedotin +/- Nembtabrutinib | CLL, MCL, FL, RTL                                                                                                                   | II                                                                                                                      | NCT05458297 | Recruiting            | Merck Sharp & Dohme LLC                                                              | USA                                                 |     |
|                                          | Zilvertamab vedotin + R-GemOx          | DLBCL                                                                                                                               | II/III                                                                                                                  | NCT05139017 | Recruiting            | Merck Sharp & Dohme LLC                                                              | USA                                                 |     |
|                                          | <b>Anti-ROR1 CAR T</b>                 | LYL797                                                                                                                              | TNBC, NSCLC, Advanced Breast Cancer, Advanced Lung Carcinoma, Relapsed Cancer, Recurrent Breast Cancer, Recurrent NSCLC | I           | NCT05274451           | Recruiting                                                                           | Lyell Immunopharma, Inc.                            | USA |
|                                          |                                        | PRGN-3007                                                                                                                           | CLL, MCL, ALL, DLBCL, TNBC                                                                                              | I           | NCT05694364           | Recruiting                                                                           | H. Lee Moffitt Cancer Center and Research Institute | USA |
| RD14-01                                  |                                        | Solid Tumor                                                                                                                         | I/II                                                                                                                    | NCT05748938 | Recruiting            | 920th Hospital of Joint Logistics Support Force of People's Liberation Army of China | China                                               |     |
| RD14-01                                  |                                        | Solid Tumor                                                                                                                         | I                                                                                                                       | NCT05638828 | Not yet recruiting    | Shen Lin                                                                             | China                                               |     |
| ONCT-808                                 |                                        | R/R Aggressive B-Cell Malignancies                                                                                                  | I/II                                                                                                                    | NCT05588440 | Recruiting            | Oncternal Therapeutics, Inc                                                          | USA                                                 |     |
| Anti-ROR1CAR-TILs                        |                                        | Liver Cancer, Lung Cancer, Breast Cancer, Colo-rectal Cancer, Brain Tumor, Solid Tumor,                                             | I                                                                                                                       | NCT04842812 | Recruiting            | Second Affiliated Hospital of Guangzhou Medical University                           | China                                               |     |

ALL: Acute Lymphoid Leukemia; AML: Acute Myeloid Leukemia; BL: Burkitt Lymphoma; CLL: Chronic Lymphocytic Leukemia; DLBCL: Diffuse Large B-Cell Lymphoma; FL: Mantle Cell Lymphoma; MCL: Mantle Cell Lymphoma; MZL: Marginal Zone Lymphoma; NHL: Non-Hodgkin Lymphoma; NSCLC: Non-small Cell Lung Cancer; NS-NSCLC: Non-squamous Non-small-cell Lung Cancer; R-CHOP: Cyclophosphamide, Doxorubicin, Rituximab/Rituximab Biosimilar, Prednisone, Prednisolone; R-GemOx: Rituximab, Gemcitabine, Oxaliplatin; RTL: Richter Transformation Lymphoma; R/R: Relapsed/Refractory; SLL: Small Lymphocytic Lymphoma; TNBC: Triple-Negative Breast Cancer; UCSD: University of California, San Diego; WM: Waldenstrom Macroglobulinemia

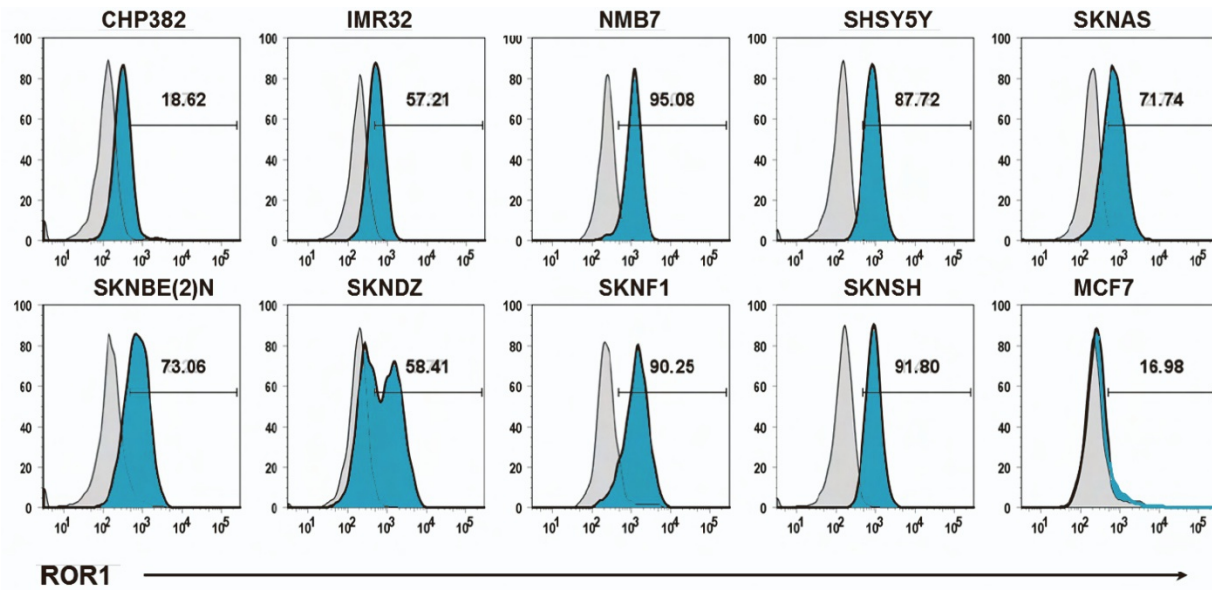

**Fig. S1. Flow cytometry analysis of ROR1 expression on NB cell lines.** ROR1 expression on NB cell lines was examined by flow cytometry analysis using anti-ROR1-APC antibody. ROR1 negative MCF7 cells were used as negative controls. Representative flow cytometric histogram data are shown.

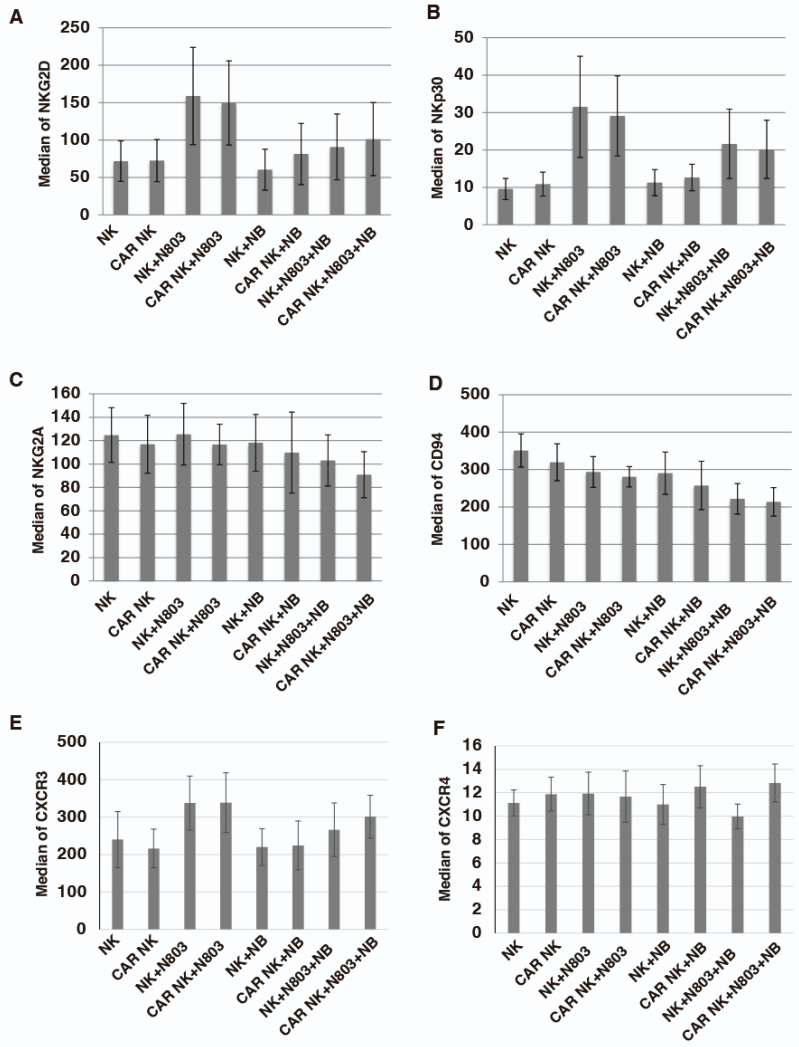

**Fig. S2. High dimensional analysis of receptors on N-803 activated anti-ROR1 CAR NK cells with/without NB by mass cytometry.** Anti-ROR1 CAR NK cells or NK cells were co-cultured with or without SKNFI and N-803 for two days. After the cells were stained and fixed, the samples were run on a CyTOF2. (A) The medians of NKG2D levels by mass cytometry on anti-ROR1 CAR NK cells or NK cells under the indicated conditions were summarized as mean $\pm$ SEM. N=3. N-803 enhanced the expression of NKG2D on both NK and anti-ROR1 CAR NK cells. (B) The medians of NKp30 levels by mass cytometry on anti-ROR1 CAR NK cells or NK cells under the indicated conditions were summarized as mean $\pm$ SEM. N=3. N-803 enhanced the expression of NKp30 on both NK and anti-ROR1

CAR NK cells. (C) The medians of NKG2A levels by mass cytometry on anti-ROR1 CAR NK cells or NK cells under the indicated conditions were summarized as mean $\pm$ SEM. N=3. (D) The medians of CD94 levels by mass cytometry on anti-ROR1 CAR NK cells or NK cells under the indicated conditions were summarized as mean $\pm$ SEM. N=3. (E) The medians of CXCR3 levels by mass cytometry on anti-ROR1 CAR NK cells or NK cells under the indicated conditions were summarized as mean $\pm$ SEM. N=3. (F) The medians of CXCR4 levels by mass cytometry on anti-ROR1 CAR NK cells or NK cells under the indicated conditions were summarized as mean $\pm$ SEM. N=3.
